# Supplementary material for: Integrative approach for detecting membrane proteins
Source: Springer Nature journal article supplement (doi:10.1186/s12859-020-03891-x), 2020-12-01
Supplement: 12859_2020_3891_MOESM1_ESM.pdf [file 12859_2020_3891_MOESM1_ESM.pdf]

# 5-Fold cross validation and 10-Fold cross validation performances

Table 1 shows the 5-Fold cross-validation performance of individual models.

Table 1: 5-Fold cross-validation performance of the individual models

| Encoding                | ML Algorithm | Sensitivity | Specificity | Accuracy | MCC  |
|-------------------------|--------------|-------------|-------------|----------|------|
| AAC                     | OET-KNN      | 71.53       | 79.31       | 75.47    | 0.51 |
|                         | KNN          | 67.01       | 84.01       | 75.62    | 0.52 |
|                         | SVM          | 71.66       | 82.82       | 77.31    | 0.55 |
|                         | GBM          | 70.72       | 83.07       | 76.98    | 0.54 |
|                         | RF           | 68.12       | 84.97       | 76.66    | 0.54 |
| PAAC                    | OET-KNN      | 69.57       | 80.10       | 74.90    | 0.50 |
|                         | KNN          | 65.59       | 81.07       | 73.43    | 0.47 |
|                         | SVM          | 76.79       | 84.15       | 80.52    | 0.61 |
|                         | GBM          | 73.92       | 84.75       | 79.41    | 0.59 |
|                         | RF           | 71.62       | 81.65       | 76.70    | 0.54 |
| PseAAC                  | OET-KNN      | 74.14       | 78.85       | 76.52    | 0.53 |
|                         | KNN          | 69.30       | 83.49       | 76.48    | 0.53 |
|                         | SVM          | 70.90       | 83.79       | 77.42    | 0.55 |
|                         | GBM          | 72.91       | 82.97       | 78.00    | 0.56 |
|                         | RF           | 68.42       | 84.81       | 76.71    | 0.54 |
| SAAC                    | OET-KNN      | 70.60       | 68.87       | 69.72    | 0.39 |
|                         | KNN          | 63.91       | 76.01       | 70.04    | 0.40 |
|                         | SVM          | 74.97       | 83.61       | 79.34    | 0.59 |
|                         | GBM          | 73.35       | 84.76       | 79.13    | 0.59 |
|                         | RF           | 68.04       | 87.24       | 77.77    | 0.56 |
| Pse-PSSM, $\lambda = 0$ | OET-KNN      | 86.27       | 88.44       | 87.37    | 0.75 |
|                         | KNN          | 79.58       | 93.18       | 86.47    | 0.74 |
|                         | SVM          | 82.81       | 90.12       | 86.51    | 0.73 |
|                         | GBM          | 81.80       | 90.18       | 86.05    | 0.72 |
|                         | RF           | 78.99       | 92.33       | 85.75    | 0.72 |
| Pse-PSSM, $\lambda = 1$ | OET-KNN      | 86.05       | 88.30       | 87.19    | 0.74 |
|                         | KNN          | 80.52       | 91.97       | 86.32    | 0.73 |
|                         | SVM          | 86.19       | 91.88       | 89.08    | 0.78 |
|                         | GBM          | 83.69       | 91.53       | 87.66    | 0.76 |
|                         | RF           | 79.22       | 93.22       | 86.31    | 0.73 |
| Pse-PSSM, $\lambda = 2$ | OET-KNN      | 85.83       | 87.85       | 86.85    | 0.74 |
|                         | KNN          | 80.38       | 91.04       | 85.78    | 0.72 |
|                         | SVM          | 86.13       | 91.77       | 88.99    | 0.78 |
|                         | GBM          | 83.98       | 91.50       | 87.79    | 0.76 |
|                         | RF           | 79.03       | 93.45       | 86.34    | 0.73 |

This table shows microaverage 5 Fold cross-validation performance of the different protein encodings on different machine learning algorithms.

Table 2 shows the 10-Fold cross-validation performance of individual models.

Table 2: 10-Fold cross-validation performance of the individual models

| Encoding                | ML Algorithm | Sensitivity | Specificity | Accuracy | MCC  |
|-------------------------|--------------|-------------|-------------|----------|------|
| AAC                     | OET-KNN      | 71.54       | 78.58       | 75.11    | 0.50 |
|                         | KNN          | 67.26       | 83.96       | 75.72    | 0.52 |
|                         | SVM          | 72.05       | 82.78       | 77.48    | 0.55 |
|                         | GBM          | 70.5        | 83.5        | 77.08    | 0.54 |
|                         | RF           | 68.48       | 84.84       | 76.77    | 0.54 |
| PAAC                    | OET-KNN      | 73.08       | 77.93       | 75.54    | 0.51 |
|                         | KNN          | 68.65       | 82.27       | 75.55    | 0.51 |
|                         | SVM          | 70.89       | 84.06       | 77.56    | 0.55 |
|                         | GBM          | 72.11       | 82.48       | 77.36    | 0.54 |
|                         | RF           | 68.53       | 84.44       | 76.59    | 0.53 |
| PseAAC                  | OET-KNN      | 69.91       | 80.07       | 75.05    | 0.50 |
|                         | KNN          | 66.08       | 80.91       | 73.59    | 0.47 |
|                         | SVM          | 76.6        | 84.36       | 80.53    | 0.61 |
|                         | GBM          | 74.02       | 84.88       | 79.52    | 0.59 |
|                         | RF           | 71.23       | 81.39       | 76.38    | 0.52 |
| SAAC                    | OET-KNN      | 71.06       | 68.9        | 69.97    | 0.39 |
|                         | KNN          | 64.22       | 76.41       | 70.39    | 0.41 |
|                         | SVM          | 74.86       | 84.26       | 79.62    | 0.59 |
|                         | GBM          | 73.52       | 84.99       | 79.33    | 0.59 |
|                         | RF           | 67.97       | 87.05       | 77.64    | 0.56 |
| Pse-PSSM, $\lambda = 0$ | OET-KNN      | 86.23       | 88.35       | 87.31    | 0.74 |
|                         | KNN          | 79.74       | 93.49       | 86.7     | 0.74 |
|                         | SVM          | 83.08       | 90.4        | 86.79    | 0.73 |
|                         | GBM          | 81.88       | 90.38       | 86.18    | 0.72 |
|                         | RF           | 79.17       | 92.35       | 85.85    | 0.72 |
| Pse-PSSM, $\lambda = 1$ | OET-KNN      | 86.31       | 89.05       | 87.7     | 0.75 |
|                         | KNN          | 80.94       | 92.31       | 86.7     | 0.73 |
|                         | SVM          | 87          | 92.06       | 89.56    | 0.79 |
|                         | GBM          | 83.98       | 91.46       | 87.77    | 0.75 |
|                         | RF           | 79.6        | 93.55       | 86.67    | 0.74 |
| Pse-PSSM, $\lambda = 2$ | OET-KNN      | 86.02       | 88.39       | 87.22    | 0.74 |
|                         | KNN          | 81.03       | 91.87       | 86.52    | 0.73 |
|                         | SVM          | 86.78       | 92.09       | 89.47    | 0.79 |
|                         | GBM          | 84.33       | 92.2        | 88.32    | 0.76 |
|                         | RF           | 79.71       | 93.54       | 86.72    | 0.74 |

This table shows microaverage 10 Fold cross-validation performance of the different protein encodings on different machine learning algorithms.
