# Supplementary material for: Integrative approach for detecting membrane proteins
Source: Springer Nature journal article supplement (doi:10.1186/s12859-020-03891-x), 2020-12-01
Supplement: 12859_2020_3891_MOESM2_ESM.pdf [file 12859_2020_3891_MOESM2_ESM.pdf]

# Detailed performance evaluation of Pse-PSSM

Fig 1 delineates the accuracy of different models trained using the Pse-PSSM encodings ( $\lambda \in (0, \dots, 49)$ ).

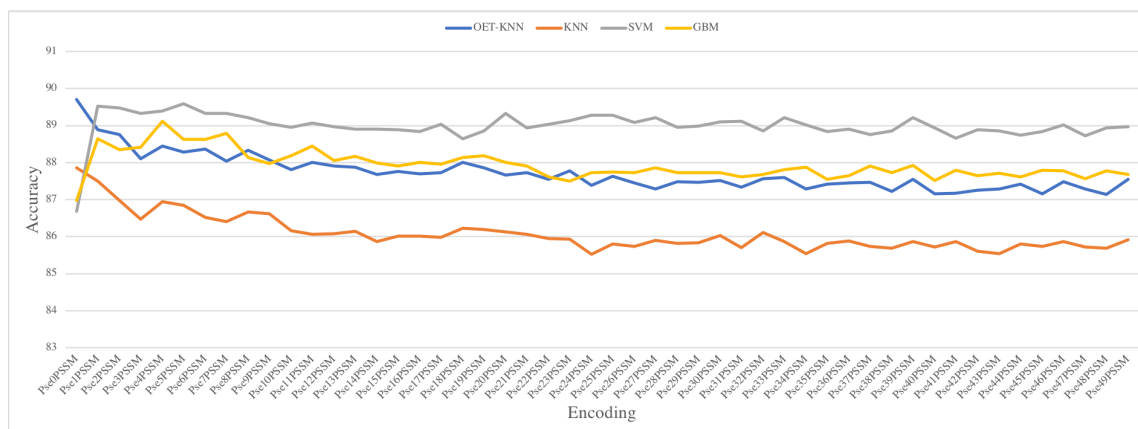

Figure 1: Choice of different models with Pse-PSSM,  $\lambda \in (0, \dots, 49)$

Table 1 shows the the detailed performance of Pse-PSSM where ( $\lambda \in (0, \dots, 49)$ ) in combination with different machine learning algorithms.

Table 1: LOOCV performances of the individual Pse-PSSM models

| Encoding               | ML Algorithm | Sensitivity | Specificity | Accuracy | MCC    |
|------------------------|--------------|-------------|-------------|----------|--------|
| Pse-PSSM, $\lambda=0$  | OET-KNN      | 86.57       | 92.75       | 89.7     | 0.7953 |
|                        | KNN          | 85.22       | 90.44       | 87.86    | 0.7580 |
|                        | SVM          | 83.23       | 90.05       | 86.68    | 0.7350 |
|                        | GBM          | 83.41       | 90.45       | 86.98    | 0.7409 |
| Pse-PSSM, $\lambda=1$  | OET-KNN      | 85.92       | 91.79       | 88.89    | 0.7788 |
|                        | KNN          | 85.89       | 89.06       | 87.50    | 0.7501 |
|                        | SVM          | 86.75       | 92.22       | 89.52    | 0.7912 |
|                        | GBM          | 85.00       | 92.19       | 88.64    | 0.7744 |
| Pse-PSSM, $\lambda=2$  | OET-KNN      | 85.51       | 91.9        | 88.75    | 0.7762 |
|                        | KNN          | 85.65       | 88.28       | 86.98    | 0.7397 |
|                        | SVM          | 86.83       | 92.06       | 89.48    | 0.7904 |
|                        | GBM          | 84.86       | 91.72       | 88.34    | 0.7682 |
| Pse-PSSM, $\lambda=3$  | OET-KNN      | 84.69       | 91.44       | 88.11    | 0.7636 |
|                        | KNN          | 84.97       | 87.92       | 86.47    | 0.7295 |
|                        | SVM          | 86.97       | 91.61       | 89.32    | 0.7871 |
|                        | GBM          | 85.01       | 91.74       | 88.42    | 0.7697 |
| Pse-PSSM, $\lambda=4$  | OET-KNN      | 85.46       | 91.37       | 88.45    | 0.7701 |
|                        | KNN          | 85.44       | 88.41       | 86.95    | 0.7390 |
|                        | SVM          | 86.87       | 91.85       | 89.39    | 0.7886 |
|                        | GBM          | 85.71       | 92.41       | 89.11    | 0.7835 |
| Pse-PSSM, $\lambda=5$  | OET-KNN      | 85.17       | 91.32       | 88.29    | 0.7668 |
|                        | KNN          | 85.60       | 88.07       | 86.85    | 0.7371 |
|                        | SVM          | 86.82       | 92.26       | 89.58    | 0.7925 |
|                        | GBM          | 85.10       | 92.08       | 88.63    | 0.7742 |
| Pse-PSSM, $\lambda=6$  | OET-KNN      | 85.26       | 91.39       | 88.37    | 0.7684 |
|                        | KNN          | 85.41       | 87.61       | 86.52    | 0.7305 |
|                        | SVM          | 86.72       | 91.85       | 89.32    | 0.7871 |
|                        | GBM          | 84.96       | 92.22       | 88.63    | 0.7743 |
| Pse-PSSM, $\lambda=7$  | OET-KNN      | 84.95       | 91.06       | 88.04    | 0.762  |
|                        | KNN          | 85.25       | 87.53       | 86.41    | 0.7281 |
|                        | SVM          | 86.80       | 91.79       | 89.32    | 0.7872 |
|                        | GBM          | 85.36       | 92.12       | 88.78    | 0.7771 |
| Pse-PSSM, $\lambda=8$  | OET-KNN      | 85.3        | 91.28       | 88.33    | 0.7676 |
|                        | KNN          | 85.45       | 87.86       | 86.67    | 0.7335 |
|                        | SVM          | 86.33       | 92.03       | 89.22    | 0.7853 |
|                        | GBM          | 84.57       | 91.60       | 88.13    | 0.7641 |
| Pse-PSSM, $\lambda=9$  | OET-KNN      | 84.81       | 91.25       | 88.07    | 0.7626 |
|                        | KNN          | 85.40       | 87.79       | 86.61    | 0.7322 |
|                        | SVM          | 86.28       | 91.75       | 89.05    | 0.7819 |
|                        | GBM          | 83.89       | 91.95       | 87.97    | 0.7614 |
| Pse-PSSM, $\lambda=10$ | OET-KNN      | 84.73       | 90.81       | 87.81    | 0.7572 |
|                        | KNN          | 85.22       | 87.08       | 86.16    | 0.7232 |
|                        | SVM          | 86.36       | 91.47       | 88.95    | 0.7796 |
|                        | GBM          | 84.46       | 91.84       | 88.19    | 0.7655 |
| Pse-PSSM, $\lambda=11$ | OET-KNN      | 84.92       | 91.00       | 88.00    | 0.7611 |
|                        | KNN          | 85.01       | 87.10       | 86.07    | 0.7214 |
|                        | SVM          | 86.31       | 91.75       | 89.06    | 0.7821 |
|                        | GBM          | 84.69       | 92.10       | 88.45    | 0.7707 |

LOOCV performances of the individual Pse-PSSM models (cont.)

| Encoding               | ML Algorithm | Sensitivity | Specificity | Accuracy | MCC    |
|------------------------|--------------|-------------|-------------|----------|--------|
| Pse-PSSM, $\lambda=12$ | OET-KNN      | 84.59       | 91.11       | 87.90    | 0.7591 |
|                        | KNN          | 85.00       | 87.13       | 86.08    | 0.7215 |
|                        | SVM          | 86.26       | 91.59       | 88.96    | 0.7800 |
|                        | GBM          | 84.24       | 91.77       | 88.06    | 0.7629 |
| Pse-PSSM, $\lambda=13$ | OET-KNN      | 84.80       | 90.87       | 87.87    | 0.7585 |
|                        | KNN          | 84.67       | 87.57       | 86.14    | 0.7229 |
|                        | SVM          | 86.42       | 91.32       | 88.90    | 0.7787 |
|                        | GBM          | 84.62       | 91.60       | 88.16    | 0.7646 |
| Pse-PSSM, $\lambda=14$ | OET-KNN      | 84.54       | 90.72       | 87.67    | 0.7545 |
|                        | KNN          | 84.92       | 86.78       | 85.87    | 0.7173 |
|                        | SVM          | 86.49       | 91.27       | 88.91    | 0.7789 |
|                        | GBM          | 84.33       | 91.55       | 87.99    | 0.7613 |
| Pse-PSSM, $\lambda=15$ | OET-KNN      | 84.64       | 90.79       | 87.76    | 0.7562 |
|                        | KNN          | 84.56       | 87.45       | 86.02    | 0.7205 |
|                        | SVM          | 86.22       | 91.49       | 88.89    | 0.7786 |
|                        | GBM          | 84.32       | 91.42       | 87.91    | 0.7598 |
| Pse-PSSM, $\lambda=16$ | OET-KNN      | 84.66       | 90.66       | 87.70    | 0.7549 |
|                        | KNN          | 85.15       | 86.87       | 86.02    | 0.7204 |
|                        | SVM          | 86.03       | 91.55       | 88.83    | 0.7774 |
|                        | GBM          | 84.15       | 91.75       | 88.00    | 0.7618 |
| Pse-PSSM, $\lambda=17$ | OET-KNN      | 84.82       | 90.56       | 87.73    | 0.7555 |
|                        | KNN          | 84.97       | 86.96       | 85.98    | 0.7195 |
|                        | SVM          | 86.56       | 91.46       | 89.04    | 0.7814 |
|                        | GBM          | 84.51       | 91.30       | 87.95    | 0.7603 |
| Pse-PSSM, $\lambda=18$ | OET-KNN      | 84.64       | 91.30       | 88.01    | 0.7616 |
|                        | KNN          | 84.72       | 87.70       | 86.23    | 0.7247 |
|                        | SVM          | 86.17       | 91.05       | 88.64    | 0.7735 |
|                        | GBM          | 84.48       | 91.68       | 88.13    | 0.7641 |
| Pse-PSSM, $\lambda=19$ | OET-KNN      | 84.96       | 90.70       | 87.86    | 0.7582 |
|                        | KNN          | 85.45       | 86.91       | 86.19    | 0.7237 |
|                        | SVM          | 86.07       | 91.55       | 88.85    | 0.7778 |
|                        | GBM          | 84.68       | 91.60       | 88.19    | 0.7652 |
| Pse-PSSM, $\lambda=20$ | OET-KNN      | 84.46       | 90.78       | 87.66    | 0.7543 |
|                        | KNN          | 84.76       | 87.47       | 86.13    | 0.7227 |
|                        | SVM          | 86.36       | 92.23       | 89.33    | 0.7876 |
|                        | GBM          | 84.17       | 91.76       | 88.01    | 0.762  |
| Pse-PSSM, $\lambda=21$ | OET-KNN      | 84.58       | 90.79       | 87.73    | 0.7556 |
|                        | KNN          | 84.59       | 87.48       | 86.06    | 0.7212 |
|                        | SVM          | 85.85       | 91.92       | 88.93    | 0.7796 |
|                        | GBM          | 83.88       | 91.81       | 87.90    | 0.7598 |
| Pse-PSSM, $\lambda=22$ | OET-KNN      | 84.12       | 90.89       | 87.55    | 0.7523 |
|                        | KNN          | 84.41       | 87.43       | 85.94    | 0.7189 |
|                        | SVM          | 86.15       | 91.85       | 89.04    | 0.7817 |
|                        | GBM          | 83.50       | 91.63       | 87.62    | 0.7543 |
| Pse-PSSM, $\lambda=23$ | OET-KNN      | 84.71       | 90.76       | 87.77    | 0.7565 |
|                        | KNN          | 84.72       | 87.10       | 85.93    | 0.7186 |
|                        | SVM          | 86.12       | 92.07       | 89.13    | 0.7837 |
|                        | GBM          | 83.64       | 91.27       | 87.50    | 0.7518 |

LOOCV performances of the individual Pse-PSSM models (cont.)

| Encoding               | ML Algorithm | Sensitivity | Specificity | Accuracy | MCC    |
|------------------------|--------------|-------------|-------------|----------|--------|
| Pse-PSSM, $\lambda=24$ | OET-KNN      | 84.61       | 90.08       | 87.38    | 0.7484 |
|                        | KNN          | 84.33       | 86.69       | 85.52    | 0.7105 |
|                        | SVM          | 86.34       | 92.13       | 89.27    | 0.7865 |
|                        | GBM          | 83.69       | 91.65       | 87.72    | 0.7564 |
| Pse-PSSM, $\lambda=25$ | OET-KNN      | 84.15       | 91.01       | 87.63    | 0.7539 |
|                        | KNN          | 84.51       | 87.07       | 85.80    | 0.7161 |
|                        | SVM          | 86.44       | 92.04       | 89.28    | 0.7865 |
|                        | GBM          | 83.79       | 91.59       | 87.74    | 0.7567 |
| Pse-PSSM, $\lambda=26$ | OET-KNN      | 84.34       | 90.47       | 87.45    | 0.75   |
|                        | KNN          | 84.52       | 86.92       | 85.73    | 0.7147 |
|                        | SVM          | 86.33       | 91.76       | 89.08    | 0.7825 |
|                        | GBM          | 83.83       | 91.50       | 87.72    | 0.7561 |
| Pse-PSSM, $\lambda=27$ | OET-KNN      | 84.32       | 90.19       | 87.29    | 0.7468 |
|                        | KNN          | 84.63       | 87.14       | 85.90    | 0.7181 |
|                        | SVM          | 86.18       | 92.15       | 89.21    | 0.7852 |
|                        | GBM          | 83.79       | 91.80       | 87.85    | 0.7589 |
| Pse-PSSM, $\lambda=28$ | OET-KNN      | 84.39       | 90.49       | 87.48    | 0.7506 |
|                        | KNN          | 84.47       | 87.13       | 85.82    | 0.7164 |
|                        | SVM          | 85.83       | 91.99       | 88.95    | 0.7802 |
|                        | GBM          | 83.74       | 91.59       | 87.72    | 0.7562 |
| Pse-PSSM, $\lambda=29$ | OET-KNN      | 84.14       | 90.70       | 87.46    | 0.7504 |
|                        | KNN          | 84.58       | 87.04       | 85.83    | 0.7166 |
|                        | SVM          | 85.97       | 91.91       | 88.98    | 0.7806 |
|                        | GBM          | 83.85       | 91.52       | 87.73    | 0.7565 |
| Pse-PSSM, $\lambda=30$ | OET-KNN      | 84.19       | 90.74       | 87.51    | 0.7514 |
|                        | KNN          | 84.54       | 87.48       | 86.03    | 0.7208 |
|                        | SVM          | 86.24       | 91.86       | 89.09    | 0.7827 |
|                        | GBM          | 83.70       | 91.65       | 87.73    | 0.7565 |
| Pse-PSSM, $\lambda=31$ | OET-KNN      | 84.25       | 90.34       | 87.34    | 0.7477 |
|                        | KNN          | 84.56       | 86.83       | 85.71    | 0.7142 |
|                        | SVM          | 86.05       | 92.08       | 89.11    | 0.7832 |
|                        | GBM          | 83.69       | 91.44       | 87.62    | 0.7541 |
| Pse-PSSM, $\lambda=32$ | OET-KNN      | 84.23       | 90.83       | 87.57    | 0.7527 |
|                        | KNN          | 84.93       | 87.25       | 86.11    | 0.7222 |
|                        | SVM          | 85.99       | 91.64       | 88.85    | 0.778  |
|                        | GBM          | 83.75       | 91.48       | 87.67    | 0.7551 |
| Pse-PSSM, $\lambda=33$ | OET-KNN      | 84.28       | 90.84       | 87.60    | 0.7533 |
|                        | KNN          | 84.32       | 87.39       | 85.87    | 0.7175 |
|                        | SVM          | 86.18       | 92.15       | 89.21    | 0.7852 |
|                        | GBM          | 84.02       | 91.50       | 87.81    | 0.7579 |
| Pse-PSSM, $\lambda=34$ | OET-KNN      | 84.02       | 90.46       | 87.28    | 0.7468 |
|                        | KNN          | 84.25       | 86.78       | 85.54    | 0.7108 |
|                        | SVM          | 86.17       | 91.77       | 89.01    | 0.7811 |
|                        | GBM          | 83.69       | 91.96       | 87.88    | 0.7597 |
| Pse-PSSM, $\lambda=35$ | OET-KNN      | 84.30       | 90.45       | 87.42    | 0.7494 |
|                        | KNN          | 84.67       | 86.93       | 85.82    | 0.7163 |
|                        | SVM          | 85.75       | 91.84       | 88.83    | 0.7778 |
|                        | GBM          | 83.74       | 91.23       | 87.54    | 0.7524 |

LOOCV performances of the individual Pse-PSSM models (cont.)

| Encoding               | ML Algorithm | Sensitivity | Specificity | Accuracy | MCC    |
|------------------------|--------------|-------------|-------------|----------|--------|
| Pse-PSSM, $\lambda=36$ | OET-KNN      | 84.15       | 90.67       | 87.45    | 0.7503 |
|                        | KNN          | 84.96       | 86.78       | 85.88    | 0.7176 |
|                        | SVM          | 85.92       | 91.80       | 88.90    | 0.7789 |
|                        | GBM          | 83.70       | 91.50       | 87.65    | 0.7549 |
| Pse-PSSM, $\lambda=37$ | OET-KNN      | 84.28       | 90.57       | 87.47    | 0.7504 |
|                        | KNN          | 84.56       | 86.89       | 85.74    | 0.7148 |
|                        | SVM          | 85.58       | 91.84       | 88.75    | 0.7761 |
|                        | GBM          | 84.03       | 91.68       | 87.90    | 0.7598 |
| Pse-PSSM, $\lambda=38$ | OET-KNN      | 84.18       | 90.18       | 87.22    | 0.7453 |
|                        | KNN          | 84.53       | 86.81       | 85.69    | 0.7137 |
|                        | SVM          | 85.93       | 91.72       | 88.86    | 0.7783 |
|                        | GBM          | 83.83       | 91.53       | 87.73    | 0.7563 |
| Pse-PSSM, $\lambda=39$ | OET-KNN      | 84.62       | 90.40       | 87.55    | 0.7519 |
|                        | KNN          | 85.00       | 86.71       | 85.87    | 0.7173 |
|                        | SVM          | 86.14       | 92.22       | 89.22    | 0.7855 |
|                        | GBM          | 83.98       | 91.76       | 87.92    | 0.7603 |
| Pse-PSSM, $\lambda=40$ | OET-KNN      | 84.08       | 90.17       | 87.16    | 0.7443 |
|                        | KNN          | 84.46       | 86.94       | 85.72    | 0.7144 |
|                        | SVM          | 86.03       | 91.76       | 88.93    | 0.7796 |
|                        | GBM          | 83.55       | 91.38       | 87.52    | 0.7522 |
| Pse-PSSM, $\lambda=41$ | OET-KNN      | 83.85       | 90.40       | 87.17    | 0.7446 |
|                        | KNN          | 84.66       | 87.03       | 85.86    | 0.7172 |
|                        | SVM          | 85.46       | 91.77       | 88.66    | 0.7744 |
|                        | GBM          | 83.85       | 91.64       | 87.80    | 0.7578 |
| Pse-PSSM, $\lambda=42$ | OET-KNN      | 84.19       | 90.24       | 87.26    | 0.7461 |
|                        | KNN          | 84.14       | 87.04       | 85.61    | 0.7123 |
|                        | SVM          | 85.94       | 91.75       | 88.88    | 0.7787 |
|                        | GBM          | 83.37       | 91.81       | 87.65    | 0.7551 |
| Pse-PSSM, $\lambda=43$ | OET-KNN      | 84.04       | 90.45       | 87.29    | 0.7469 |
|                        | KNN          | 84.37       | 86.69       | 85.54    | 0.7109 |
|                        | SVM          | 85.73       | 91.92       | 88.86    | 0.7784 |
|                        | GBM          | 83.83       | 91.49       | 87.71    | 0.756  |
| Pse-PSSM, $\lambda=44$ | OET-KNN      | 84.24       | 90.50       | 87.41    | 0.7493 |
|                        | KNN          | 84.78       | 86.80       | 85.80    | 0.7160 |
|                        | SVM          | 85.88       | 91.53       | 88.74    | 0.7757 |
|                        | GBM          | 83.56       | 91.55       | 87.61    | 0.7541 |
| Pse-PSSM, $\lambda=45$ | OET-KNN      | 84.02       | 90.22       | 87.16    | 0.7442 |
|                        | KNN          | 84.56       | 86.89       | 85.74    | 0.7148 |
|                        | SVM          | 85.80       | 91.77       | 88.83    | 0.7776 |
|                        | GBM          | 83.83       | 91.66       | 87.80    | 0.7578 |
| Pse-PSSM, $\lambda=46$ | OET-KNN      | 84.32       | 90.56       | 87.48    | 0.7507 |
|                        | KNN          | 84.51       | 87.20       | 85.87    | 0.7175 |
|                        | SVM          | 85.97       | 91.99       | 89.02    | 0.7815 |
|                        | GBM          | 83.73       | 91.70       | 87.77    | 0.7572 |
| Pse-PSSM, $\lambda=47$ | OET-KNN      | 84.03       | 90.47       | 87.29    | 0.747  |
|                        | KNN          | 84.48       | 86.93       | 85.72    | 0.7145 |
|                        | SVM          | 85.71       | 91.65       | 88.72    | 0.7755 |
|                        | GBM          | 83.54       | 91.49       | 87.57    | 0.7532 |
| Pse-PSSM, $\lambda=48$ | OET-KNN      | 83.85       | 90.34       | 87.14    | 0.7439 |
|                        | KNN          | 84.47       | 86.88       | 85.69    | 0.7138 |
|                        | SVM          | 85.81       | 91.97       | 88.93    | 0.7798 |
|                        | GBM          | 83.73       | 91.70       | 87.77    | 0.7572 |
| Pse-PSSM, $\lambda=49$ | OET-KNN      | 84.19       | 90.82       | 87.55    | 0.7522 |
|                        | KNN          | 84.43       | 87.35       | 85.91    | 0.7183 |
|                        | SVM          | 85.93       | 91.92       | 88.96    | 0.7803 |
|                        | GBM          | 83.69       | 91.58       | 87.68    | 0.7556 |
